# Supplementary material
Source: HighWire-hosted journal article supplement (https://bmjopen.bmj.com/content/10/9/e036407)
Supplement: inline-supplementary-material-1 [file inline-supplementary-material-1.pdf]

## APPENDICES

## APPENDIX 1. PRISMA CHECKLIST

| Section/topic                                                                                                                                         | #  | Checklist item                                                                                                                                                                                                                                                                                              | Reported on page #   |
|-------------------------------------------------------------------------------------------------------------------------------------------------------|----|-------------------------------------------------------------------------------------------------------------------------------------------------------------------------------------------------------------------------------------------------------------------------------------------------------------|----------------------|
| TITLE [Characterization of the environmental presence of hepatitis A virus in Low and Middle-Income Countries: A systematic review and meta-analysis] |    |                                                                                                                                                                                                                                                                                                             | Pg. 1                |
| Title                                                                                                                                                 | 1  | Identify the report as a systematic review, meta-analysis, or both.                                                                                                                                                                                                                                         | pg.1                 |
| ABSTRACT                                                                                                                                              |    |                                                                                                                                                                                                                                                                                                             | Pg. 2                |
| Structured summary                                                                                                                                    | 2  | Provide a structured summary including, as applicable: background; objectives; data sources; study eligibility criteria, participants, and interventions; study appraisal and synthesis methods; results; limitations; conclusions and implications of key findings; systematic review registration number. | Pg.2-3 line 1-33     |
| INTRODUCTION                                                                                                                                          |    |                                                                                                                                                                                                                                                                                                             | Pg. 4                |
| Rationale                                                                                                                                             | 3  | Describe the rationale for the review in the context of what is already known.                                                                                                                                                                                                                              | Pg. 3 line 81-90     |
| Objectives                                                                                                                                            | 4  | Provide an explicit statement of questions being addressed with reference to participants, interventions, comparisons, outcomes, and study design (PICOS).                                                                                                                                                  | Pg. 4 line 97-103    |
| METHODS                                                                                                                                               |    |                                                                                                                                                                                                                                                                                                             | Pg. 5 line 92        |
| Protocol and registration                                                                                                                             | 5  | Indicate if a review protocol exists, if and where it can be accessed (e.g., Web address), and, if available, provide registration information including registration number.                                                                                                                               | Pg. 4 line 93        |
| Eligibility criteria                                                                                                                                  | 6  | Specify study characteristics (e.g., PICOS, length of follow-up) and report characteristics (e.g., years considered, language, publication status) used as criteria for eligibility, giving rationale.                                                                                                      | Pg. 5 line 106       |
| Information sources                                                                                                                                   | 7  | Describe all information sources (e.g., databases with dates of coverage, contact with study authors to identify additional studies) in the search and date last searched.                                                                                                                                  | Pg. 5 line 116-119   |
| Search                                                                                                                                                | 8  | Present full electronic search strategy for at least one database, including any limits used, such that it could be repeated.                                                                                                                                                                               | Pg. 5 line 113       |
| Study selection                                                                                                                                       | 9  | State the process for selecting studies (i.e., screening, eligibility, included in systematic review, and, if applicable, included in the meta-analysis).                                                                                                                                                   | Pg. 6 line 126-132   |
| Data collection process                                                                                                                               | 10 | Describe method of data extraction from reports (e.g., piloted forms, independently, in duplicate) and any processes for obtaining and confirming data from investigators.                                                                                                                                  | Pg. 6 line 135-140   |
| Data items                                                                                                                                            | 11 | List and define all variables for which data were sought (e.g., PICOS, funding sources) and any assumptions and simplifications made.                                                                                                                                                                       | Pg. 5 line 109-111   |
| Risk of bias in individual studies                                                                                                                    | 12 | Describe methods used for assessing risk of bias of individual studies (including specification of whether this was done at the study or outcome level), and how this information is to be used in any data synthesis.                                                                                      | Pg. 6-7 line 154-159 |
| Summary measures                                                                                                                                      | 13 | State the principal summary measures (e.g., risk ratio, difference in means).                                                                                                                                                                                                                               | Pg. 6 line 143-144   |
| Synthesis of results                                                                                                                                  | 14 | Describe the methods of handling data and combining results of studies, if done, including measures of consistency (e.g., I <sup>2</sup> ) for each meta-analysis.                                                                                                                                          | Pg. 6 line 142-152   |

| Section/topic                 | #  | Checklist item                                                                                                                                                                                                                                                                                                                                                                                                                                                                                                     | Reported on page #   |
|-------------------------------|----|--------------------------------------------------------------------------------------------------------------------------------------------------------------------------------------------------------------------------------------------------------------------------------------------------------------------------------------------------------------------------------------------------------------------------------------------------------------------------------------------------------------------|----------------------|
| Risk of bias across studies   | 15 | Specify any assessment of risk of bias that may affect the cumulative evidence (e.g., publication bias, selective reporting within studies).                                                                                                                                                                                                                                                                                                                                                                       | N/A                  |
| Additional analyses           | 16 | Describe methods of additional analyses (e.g., sensitivity or subgroup analyses, meta-regression), if done, indicating which were pre-specified.                                                                                                                                                                                                                                                                                                                                                                   | N/A                  |
| RESULTS                       |    |                                                                                                                                                                                                                                                                                                                                                                                                                                                                                                                    | Pg. 7 line 161       |
| Study selection               | 17 | Give numbers of studies screened, assessed for eligibility, and included in the review, with reasons for exclusions at each stage, ideally with a flow diagram.                                                                                                                                                                                                                                                                                                                                                    | Pg. 7 line 162       |
| Study characteristics         | 18 | For each study, present characteristics for which data were extracted (e.g., study size, PICOS, follow-up period) and provide the citations.                                                                                                                                                                                                                                                                                                                                                                       | Pg. 7 line 168       |
| Risk of bias within studies   | 19 | Present data on risk of bias of each study and, if available, any outcome level assessment (see item 12).                                                                                                                                                                                                                                                                                                                                                                                                          | Pg. 8 line 211       |
| Results of individual studies | 20 | For all outcomes considered (benefits or harms), present, for each study: (a) simple summary data for each intervention group (b) effect estimates and confidence intervals, ideally with a forest plot.                                                                                                                                                                                                                                                                                                           | Pg. 8 line 192       |
| Synthesis of results          | 21 | Present results of each meta-analysis done, including confidence intervals and measures of consistency.<br>[from the PRISMA website, added by the authors of the manuscript:] Please note that the published PRISMA checklists contain an error in the wording for Item 21. The item should read: "Present the main results of the review. If meta-analyses are done, include for each, confidence intervals and measures of consistency" in accordance with the text in the Explanation and Elaboration document. | Pg. 7 line 194-209   |
| Risk of bias across studies   | 22 | Present results of any assessment of risk of bias across studies (see Item 15).                                                                                                                                                                                                                                                                                                                                                                                                                                    | Pg. 8 line 211       |
| Additional analysis           | 23 | Give results of additional analyses, if done (e.g., sensitivity or subgroup analyses, meta-regression [see Item 16]).                                                                                                                                                                                                                                                                                                                                                                                              | NA                   |
| DISCUSSION                    |    |                                                                                                                                                                                                                                                                                                                                                                                                                                                                                                                    | Pg. 8-9 line 217-254 |
| Summary of evidence           | 24 | Summarize the main findings including the strength of evidence for each main outcome; consider their relevance to key groups (e.g., healthcare providers, users, and policy makers).                                                                                                                                                                                                                                                                                                                               | Pg. 10 line 255      |
| Limitations                   | 25 | Discuss limitations at study and outcome level (e.g., risk of bias), and at review-level (e.g., incomplete retrieval of identified research, reporting bias).                                                                                                                                                                                                                                                                                                                                                      | Pg. 10 line 262      |
| Conclusions                   | 26 | Provide a general interpretation of the results in the context of other evidence, and implications for future research.                                                                                                                                                                                                                                                                                                                                                                                            | Pg. 10 line 267      |
| FUNDING                       |    |                                                                                                                                                                                                                                                                                                                                                                                                                                                                                                                    |                      |
| Funding                       | 27 | Describe sources of funding for the systematic review and other support (e.g., supply of data); role of funders for the systematic review.                                                                                                                                                                                                                                                                                                                                                                         | Pg. 11 line 287      |

| Appendix 2: Search strategy used in PUBMED |                  |                                                                                                                                                                                                                                                                                                                                                                                                                                                                                                                                                                                                                                                                                                                                                                                                                                                                                                                                                                                                                                                                                                                       |
|--------------------------------------------|------------------|-----------------------------------------------------------------------------------------------------------------------------------------------------------------------------------------------------------------------------------------------------------------------------------------------------------------------------------------------------------------------------------------------------------------------------------------------------------------------------------------------------------------------------------------------------------------------------------------------------------------------------------------------------------------------------------------------------------------------------------------------------------------------------------------------------------------------------------------------------------------------------------------------------------------------------------------------------------------------------------------------------------------------------------------------------------------------------------------------------------------------|
| Query                                      | Fields           | Search term                                                                                                                                                                                                                                                                                                                                                                                                                                                                                                                                                                                                                                                                                                                                                                                                                                                                                                                                                                                                                                                                                                           |
| #1                                         | All              | hepatitis A OR hep A OR hepatitis A virus OR HAV                                                                                                                                                                                                                                                                                                                                                                                                                                                                                                                                                                                                                                                                                                                                                                                                                                                                                                                                                                                                                                                                      |
| #2                                         | All              | environment OR raw sewage OR treated sewage OR sludge OR water OR surface water OR groundwater OR drinking water OR seawater OR ocean water OR irrigation water OR soil OR crops OR food OR shellfish                                                                                                                                                                                                                                                                                                                                                                                                                                                                                                                                                                                                                                                                                                                                                                                                                                                                                                                 |
| #3                                         | All              | Afghanistan OR Angola OR Bangladesh OR Benin OR Bhutan OR Bolivia OR Burkina Faso OR Burundi OR Cabo Verde OR Cambodia OR Cameroon OR Central African Republic OR Chad OR Comoros OR Congo, Dem. Rep. OR Congo, Rep. OR Cote d'Ivoire OR Djibouti OR Egypt, Arab Rep. OR El Salvador OR Eritrea OR Ethiopia OR Gambia, The OR Georgia OR Ghana OR Guinea OR Guinea-Bissau OR Haiti OR Honduras OR India OR Indonesia OR Kenya OR Kiribati OR Korea, Dem. People's Rep. OR Kosovo OR Kyrgyz Republic OR Lao PDR OR Lesotho OR Liberia OR Madagascar OR Malawi OR Mali OR Mauritania OR Micronesia, Fed. Sts. OR Moldova OR Mongolia OR Morocco OR Mozambique OR Myanmar OR Nepal OR Nicaragua OR Niger OR Nigeria OR Pakistan OR Papua New Guinea OR Philippines OR Rwanda OR Sao Tome and Principe OR Senegal OR Sierra Leone OR Solomon Islands OR Somalia OR South Sudan OR Sri Lanka OR Sudan OR Swaziland OR Syrian Arab Republic OR Tajikistan OR Tanzania OR Timor-Leste OR Togo OR Tunisia OR Uganda OR Ukraine OR Uzbekistan OR Vanuatu OR Vietnam OR West Bank and Gaza OR Yemen, Rep. OR Zambia OR Zimbabwe |
| #4                                         | #1 AND #2 AND #3 |                                                                                                                                                                                                                                                                                                                                                                                                                                                                                                                                                                                                                                                                                                                                                                                                                                                                                                                                                                                                                                                                                                                       |

| APPENDIX 3: DATA EXTRACTION FORM                         |                                        |                                  |                          |                          |                                                      |
|----------------------------------------------------------|----------------------------------------|----------------------------------|--------------------------|--------------------------|------------------------------------------------------|
| Date form completed (dd/mm/yyyy)                         |                                        |                                  |                          |                          |                                                      |
| Study ID Number                                          |                                        |                                  |                          |                          |                                                      |
| Reference citation                                       |                                        |                                  |                          |                          |                                                      |
| First Author                                             |                                        |                                  |                          |                          |                                                      |
| Study author contact details                             |                                        |                                  |                          |                          |                                                      |
| Publication type<br>(e.g. full report, abstract, letter) |                                        |                                  |                          |                          |                                                      |
| Notes:                                                   |                                        |                                  |                          |                          |                                                      |
| Study eligibility                                        |                                        |                                  |                          |                          |                                                      |
| Study Characteristics                                    | Eligibility criteria                   | Eligibility criteria met?        |                          |                          | Location in text or source (pg. & ¶/fig/table/other) |
|                                                          |                                        | Yes                              | No                       | Unclear                  |                                                      |
| Type of study                                            | Cross-sectional study                  | <input type="checkbox"/>         | <input type="checkbox"/> | <input type="checkbox"/> |                                                      |
|                                                          | Ecological study                       | <input type="checkbox"/>         | <input type="checkbox"/> | <input type="checkbox"/> |                                                      |
| Participants                                             | Reports Environmental Source of HAV    | <input type="checkbox"/>         | <input type="checkbox"/> | <input type="checkbox"/> |                                                      |
|                                                          | Study conducted in a LMIC              | <input type="checkbox"/>         | <input type="checkbox"/> | <input type="checkbox"/> |                                                      |
| Types of outcome measures                                | Reports Quantifiable HAV concentration | <input type="checkbox"/>         | <input type="checkbox"/> | <input type="checkbox"/> |                                                      |
| INCLUDE <input type="checkbox"/>                         |                                        | EXCLUDE <input type="checkbox"/> |                          |                          |                                                      |
| Reason for exclusion                                     |                                        |                                  |                          |                          |                                                      |
| Notes:                                                   |                                        |                                  |                          |                          |                                                      |

DO NOT PROCEED IF STUDY EXCLUDED FROM REVIEW

## CHARACTERISTICS OF INCLUDED STUDIES

|                                        | Descriptions as stated in report/paper                                             | Location in text or source<br>(pg. & ¶/fig/table/other) |
|----------------------------------------|------------------------------------------------------------------------------------|---------------------------------------------------------|
| <b>Aim and objectives of the study</b> |                                                                                    |                                                         |
| <b>Setting</b>                         | Country .....                                                                      |                                                         |
|                                        | Income Level                      Low                      Middle                  |                                                         |
|                                        | HAV Immunisation program in place                      Yes                      No |                                                         |
|                                        | Year HAV Immunisation program 1 <sup>st</sup> initiated .....                      |                                                         |
|                                        | Water, sanitation and hygiene (WASH) performance index.....                        |                                                         |
|                                        | Urban                      Peri-urban                      Rural                   |                                                         |
| <b>Study Start Date</b>                |                                                                                    |                                                         |
| <b>Study End Date</b>                  |                                                                                    |                                                         |
| <b>Notes:</b>                          |                                                                                    |                                                         |

## Outcome 1

|                          | Description as stated in report/paper                                                                                                                                                                                                                           | Location in text or source<br>(pg. & ¶/fig/table/other) |
|--------------------------|-----------------------------------------------------------------------------------------------------------------------------------------------------------------------------------------------------------------------------------------------------------------|---------------------------------------------------------|
| <b>Outcome name</b>      |                                                                                                                                                                                                                                                                 |                                                         |
| Month of data Collection | JAN/.....                      JUL/....<br>FEB/.....                      AUG/....<br>MAR/.....                      SEP/....<br>APR/.....                      OCT/....<br>MAY/.....                      NOV/....<br>JUN /.....                      DEC/.... |                                                         |

|                                                         |                                                                                           |  |
|---------------------------------------------------------|-------------------------------------------------------------------------------------------|--|
| Number of samples                                       | .....                                                                                     |  |
| Outcome definition (HAV quantification criteria)        |                                                                                           |  |
| Method of HAV detection                                 | RT-PCR    RT-qPCR    NASBA    Other<br>(specify).....                                     |  |
| Unit of measurement                                     | Genome copies    Whole virus<br>Others (specify) .....                                    |  |
| Genotypes detected                                      | I    II    III    IV    V    VI                                                           |  |
| Reported HAV Concentration                              | .....                                                                                     |  |
| Standardised/ Corrected HAV concentration (if reported) | .....                                                                                     |  |
| Grade of Quantity/concentration                         | High    Low                                                                               |  |
| Is outcome/ reported concentration validated?           | <input type="checkbox"/> Yes <input type="checkbox"/> No <input type="checkbox"/> Unclear |  |
| Limitations of the study                                |                                                                                           |  |
| Imputation of missing data                              |                                                                                           |  |
| Notes:                                                  |                                                                                           |  |

**Outcome 2**

|                                                              | Description as stated in report/paper | Location in text or source (pg. & ¶/fig/table/other) |
|--------------------------------------------------------------|---------------------------------------|------------------------------------------------------|
| Outcome name (Type of environmental source of HAV)           |                                       |                                                      |
|                                                              | Description                           | HAV concentration                                    |
| Source 1                                                     |                                       |                                                      |
| Source 2                                                     |                                       |                                                      |
| Source 3                                                     |                                       |                                                      |
| Source 4                                                     |                                       |                                                      |
| Source 5                                                     |                                       |                                                      |
| Source 6                                                     |                                       |                                                      |
| Source 7                                                     |                                       |                                                      |
| Source 8                                                     |                                       |                                                      |
| Source 9                                                     |                                       |                                                      |
| Source 10                                                    |                                       |                                                      |
| Source 11                                                    |                                       |                                                      |
| Notes:                                                       |                                       |                                                      |
| <b>Study funding sources</b><br>(including role of funders)  |                                       |                                                      |
| <b>Possible conflicts of interest</b><br>(for study authors) |                                       |                                                      |
| <b>Notes:</b>                                                |                                       |                                                      |

| APPENDIX 4: RISK OF BIAS ASSESSMENT TOOL                                                                                                                                               |        |    |
|----------------------------------------------------------------------------------------------------------------------------------------------------------------------------------------|--------|----|
| Risk of bias Item                                                                                                                                                                      | Answer |    |
|                                                                                                                                                                                        | Yes    | No |
| <b>External validity</b>                                                                                                                                                               |        |    |
| Was the study's target environmental source a good representation of the overall HAV environmental presence in the region?                                                             |        |    |
| Were the study samples a true or close representation of the targeted environmental source?                                                                                            |        |    |
| Was some form of random selection used to select the samples, OR was a logical method used to arrive at the samples selected?                                                          |        |    |
| Was the likelihood of nonresponse bias minimal?                                                                                                                                        |        |    |
| <b>Internal validity</b>                                                                                                                                                               |        |    |
| Were data collected directly from the environmental source?                                                                                                                            |        |    |
| Was an acceptable viral detection criterion used in the study?                                                                                                                         |        |    |
| Was the study detection instrument validated?                                                                                                                                          |        |    |
| Was the same mode of viral detection used for all subjects?                                                                                                                            |        |    |
| Was the length of the shortest prevalence period for the parameter of interest appropriate?                                                                                            |        |    |
| Were the numerator(s) and denominator(s) for the parameter of interest appropriate?                                                                                                    |        |    |
| Summary item on the overall risk of study bias                                                                                                                                         |        |    |
| <b>LOW RISK OF BIAS:</b> 8 or more "yes" answers. Further research is very unlikely to change our confidence in the estimate.                                                          |        |    |
| <b>MODERATE RISK OF BIAS:</b> 6 to 7 "yes" answers. Further research is likely to have an important impact on our confidence in the estimate and may change the estimate.              |        |    |
| <b>HIGH RISK OF BIAS:</b> 5 or fewer "yes" answers. Further research is very likely to have an important impact on our confidence in the estimate and is likely to change the estimate |        |    |

| <b>Appendix 5. Summary of risk of bias assessment showing scores and grades for all included studies</b> |                   |        |        |                   |        |        |        |        |        |         |             |                     |
|----------------------------------------------------------------------------------------------------------|-------------------|--------|--------|-------------------|--------|--------|--------|--------|--------|---------|-------------|---------------------|
| Citation                                                                                                 | External Validity |        |        | Internal Validity |        |        |        |        |        |         | Total score | Risk of Bias Rating |
|                                                                                                          | Item 1            | Item 2 | Item 3 | Item 4            | Item 5 | Item 6 | Item 7 | Item 8 | Item 9 | Item 10 |             |                     |
| Rachida et al., 2016                                                                                     | 1                 | 0      | 0      | 1                 | 1      | 1      | 1      | 1      | 1      | 1       | 8           | Low risk            |
| Osuolale et al., 2015                                                                                    | 1                 | 1      | 1      | 1                 | 1      | 1      | 1      | 1      | 1      | 1       | 10          | Low risk            |
| Adefisoye et al., 2015                                                                                   | 1                 | 1      | 1      | 1                 | 1      | 1      | 1      | 1      | 1      | 1       | 10          | Low risk            |
| Said et al., 2014                                                                                        | 1                 | 1      | 1      | 1                 | 1      | 1      | 1      | 1      | 1      | 1       | 10          | Low risk            |
| Chigor et al., 2012                                                                                      | 1                 | 1      | 1      | 1                 | 1      | 1      | 1      | 1      | 1      | 1       | 10          | Low risk            |
| Venter et al., 2007                                                                                      | 1                 | 1      | 1      | 1                 | 1      | 1      | 1      | 1      | 1      | 1       | 10          | Low risk            |
| Nenonen et al., 2009                                                                                     | 0                 | 1      | 0      | 1                 | 1      | 1      | 1      | 1      | 1      | 1       | 8           | Low risk            |
| O'Brien et al., 2017                                                                                     | 1                 | 1      | 1      | 1                 | 1      | 1      | 1      | 1      | 1      | 1       | 10          | Low risk            |
| Katukiza et al., 2013                                                                                    | 1                 | 1      | 1      | 1                 | 1      | 1      | 1      | 1      | 1      | 1       | 10          | Low risk            |
| Kiulia et al., 2009                                                                                      | 1                 | 1      | 1      | 1                 | 1      | 1      | 1      | 1      | 1      | 1       | 10          | Low risk            |
| Jebri et al., 2012                                                                                       | 0                 | 1      | 0      | 1                 | 1      | 1      | 1      | 1      | 1      | 1       | 8           | Low risk            |
| Ouardani et al., 2016                                                                                    | 1                 | 1      | 1      | 1                 | 1      | 1      | 1      | 1      | 1      | 1       | 10          | Low risk            |
| Ouardani et al., 2015                                                                                    | 1                 | 1      | 1      | 1                 | 1      | 1      | 1      | 1      | 1      | 1       | 10          | Low risk            |
| Khelifi et al., 2011                                                                                     | 0                 | 0      | 0      | 1                 | 1      | 1      | 1      | 1      | 1      | 1       | 7           | Moderate risk       |
| Be'ji-Hamza et al., 2014                                                                                 | 1                 | 1      | 1      | 1                 | 1      | 1      | 1      | 1      | 1      | 1       | 10          | Low risk            |
| Amri et al., 2009                                                                                        | 1                 | 1      | 1      | 1                 | 1      | 1      | 1      | 1      | 1      | 1       | 10          | Low risk            |
| Mouna et al., 2010                                                                                       | 1                 | 1      | 0      | 1                 | 1      | 1      | 1      | 1      | 1      | 1       | 9           | Low risk            |
| Khelifi et al., 2006                                                                                     | 1                 | 1      | 1      | 1                 | 1      | 1      | 1      | 1      | 1      | 1       | 10          | Low risk            |
| Elamri et al., 2006                                                                                      | 1                 | 1      | 1      | 1                 | 1      | 1      | 1      | 1      | 1      | 1       | 10          | Low risk            |
| Amdiouni et al., 2017                                                                                    | 1                 | 1      | 1      | 1                 | 1      | 1      | 1      | 1      | 1      | 1       | 10          | Low risk            |
| Benabbes et al., 2012                                                                                    | 1                 | 1      | 0      | 1                 | 1      | 1      | 1      | 1      | 1      | 1       | 9           | Low risk            |
| Guerrero et al., 2011                                                                                    | 1                 | 1      | 0      | 1                 | 1      | 1      | 1      | 1      | 1      | 1       | 9           | Low risk            |
| Ahmad et al., 2018                                                                                       | 1                 | 1      | 1      | 1                 | 1      | 1      | 1      | 1      | 1      | 1       | 10          | Low risk            |
| Ahmad et al., 2016                                                                                       | 1                 | 1      | 1      | 1                 | 1      | 1      | 1      | 1      | 1      | 1       | 10          | Low risk            |
| Ahmad et al., 2015                                                                                       | 1                 | 1      | 1      | 1                 | 1      | 1      | 1      | 1      | 1      | 0       | 9           | Low risk            |
| Khan et al., 2014                                                                                        | 0                 | 0      | 0      | 1                 | 1      | 1      | 1      | 1      | 1      | 1       | 7           | Moderate risk       |
| Chobe et al., 2009                                                                                       | 0                 | 0      | 0      | 1                 | 1      | 1      | 1      | 1      | 1      | 1       | 7           | Moderate risk       |
| Arankalle et al., 2006                                                                                   | 0                 | 0      | 0      | 1                 | 1      | 1      | 1      | 1      | 1      | 1       | 7           | Moderate risk       |
| Umesha et al., 2007                                                                                      | 1                 | 1      | 1      | 1                 | 1      | 1      | 1      | 1      | 1      | 1       | 10          | Low risk            |
| Phanuwan et al., 2006                                                                                    | 1                 | 0      | 0      | 1                 | 1      | 1      | 1      | 1      | 1      | 1       | 8           | Low risk            |
| Chadha et al., 2009                                                                                      | 0                 | 0      | 0      | 0                 | 1      | 1      | 1      | 1      | 1      | 0       | 5           | High Risk           |
| Chitambar et al., 2007                                                                                   | 1                 | 1      | 1      | 1                 | 1      | 1      | 1      | 1      | 1      | 1       | 10          | Low risk            |
| Bai et al., 2019                                                                                         | 1                 | 1      | 1      | 1                 | 1      | 1      | 1      | 1      | 1      | 1       | 10          | Low risk            |

**Item definitions**  
1. Samples' representation of the region. 2. Sample's representation of the environmental source 3. Random sampling done or not done 4. Likelihood of bias due to non-response 5. Direct collection of samples from source 6. Acceptable detection criterion used 7. Detection instrument validated 8. Same detection techniques used 9. Appropriate shortest prevalence period 10. Appropriate denominators and numerators used in calculation of detection.
